# Supplementary material for: Live Tissue Imaging to Elucidate Mechanical Modulation of Stem Cell Niche Quiescence
Source: PubMed Central journal article supplement (PMC5442759; doi:10.5966/sctm.2015-0306), 2016-07-28
Supplement: SCT3-6-285-s001.pdf [file SCT3-6-285-s001.pdf]

Supplemental Figure – Knothe Tate et al.

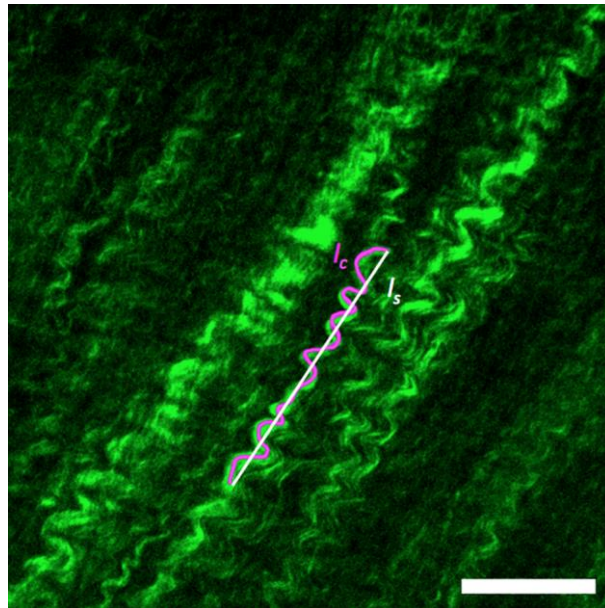

**Figure S1. Representative image demonstrating definition of measured parameters for collagen crimp measurement.** The curved length of collagen fiber bundles ( $l_c$ ) and straight line ( $l_s$ ) connecting the ends of measured fiber bundle were measured with semi-automated NeuroJ plugin (ImageJ2), giving the degree of crimp in collagen filaments  $C = (l_c - l_s) / l_s \times 100\%$ .
